# Supplementary material for: Intradermal delivery of an angiotensin II receptor blocker using a personalized microneedle patch for treatment of hypertrophic scars
Source: Royal Society of Chemistry journal article supplement (doi:10.1039/d2bm01631a), 2022-11-25
Supplement: d2bm01631a1.pdf [file d2bm01631a1.pdf]

## Supporting Information

### **Intradermal delivery of an angiotensin II receptor blocker by personalized microneedle patch for treatment of hypertrophic scar**

Yihui Huang<sup>1#</sup>, Jingwen Li<sup>2#</sup>, Yan Wang<sup>2</sup>, Danyang Chen<sup>1</sup>, Jianglong Huang<sup>3</sup>, Wubin Dai<sup>4</sup>, Pan Peng<sup>1</sup>, Liang Guo<sup>1\*</sup>, Yifeng Lei<sup>2\*</sup>

<sup>1</sup> Department of Plastic Surgery, Zhongnan Hospital of Wuhan University, Wuhan 430071, China

<sup>2</sup> The Institute of Technological Science & School of Power and Mechanical Engineering, Wuhan University, Wuhan 430072, China

<sup>3</sup> Department of Dermatology and Cosmetic Medicine, Hubei Aerospace Hospital, Xiaogan 432000, China

<sup>4</sup> School of Material Science and Engineering, Wuhan Institute of Technology, Wuhan 430205, China

<sup>#</sup>These authors contributed equally to this work.

\* Corresponding authors:

Yifeng Lei, E-mail: [yifenglei@whu.edu.cn](mailto:yifenglei@whu.edu.cn)

Liang Guo, E-mail: [guolianghbwh@163.com](mailto:guolianghbwh@163.com)

**Table S1.** Different material compositions of microneedle patches.

| Name | Gelatin (m/v) | Starch (m/v) | Hydroxyapatite (m/v) |
|------|---------------|--------------|----------------------|
| M1   | 5%            | 5%           | 0                    |
| M3   | 5%            | 5%           | 2%                   |

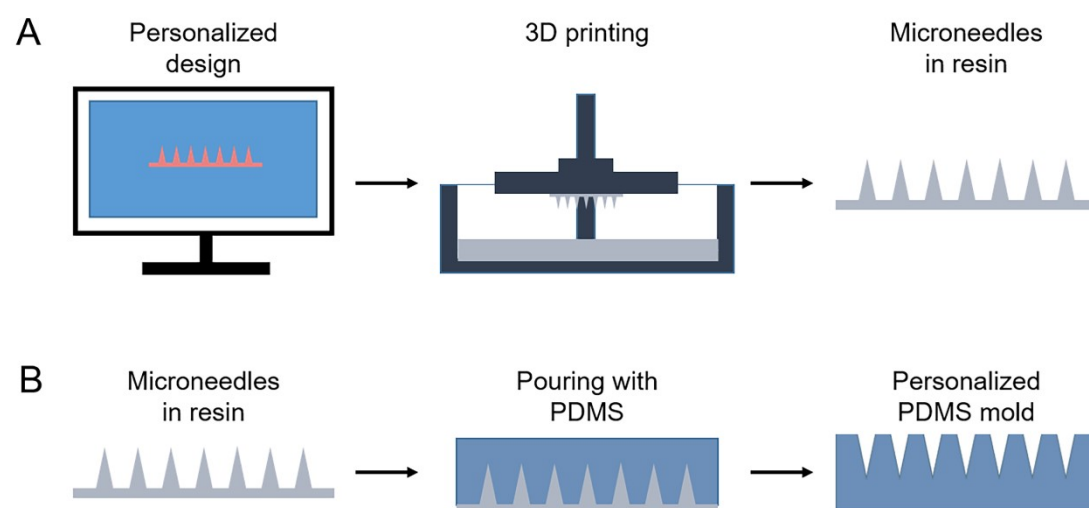

**Fig. S1** Preparation of personalized PDMS molds. (A) 3D printing of microneedle array with photocurable resin by stereolithography. (B) Fabrication process of personalized PDMS mold from the-above printed microneedle array in resin.

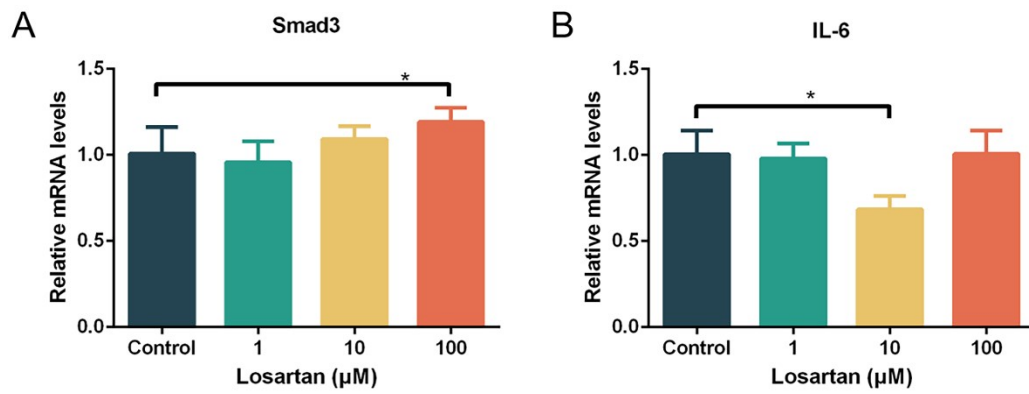

**Fig. S2** Relative mRNA expressions of Smad3 (A) and IL-6 (B) in HSFs. HSFs are treated by different concentrations of losartan for 24 h. \*  $P < 0.05$ .

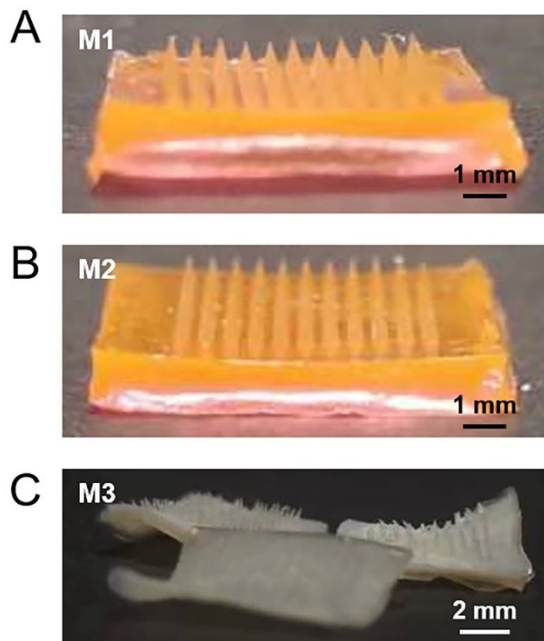

**Fig. S3** Optical images of microneedle patches prepared with different materials, including materials of M1 (A), M2 (B), and M3 (C), respectively.

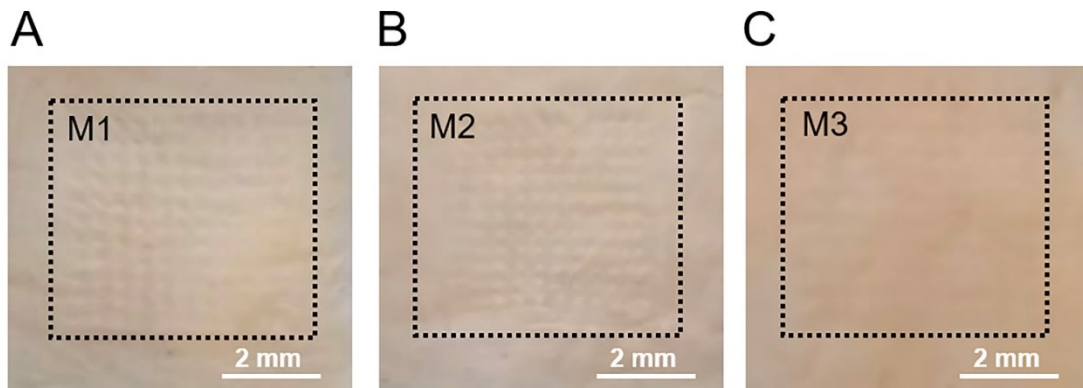

**Fig. S4** Puncture assay of different microneedle patches to porcine skins. Microneedle patches include M1 (A), M2 (B), and M3 (C), respectively.

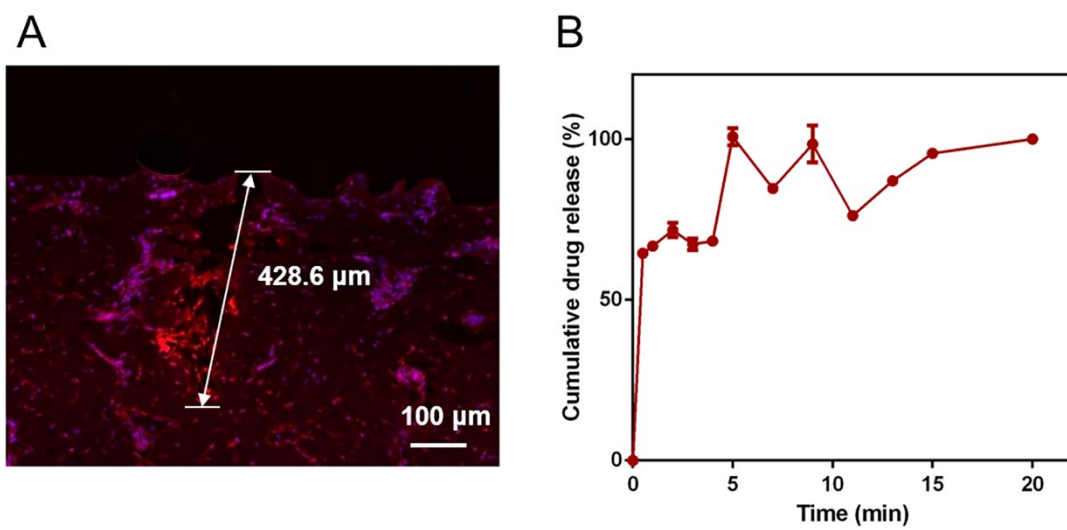

**Fig. S5** (A) Confocal image of porcine skin after insertion with rhodamine 6G-loaded microneedle patch. The arrow indicates a deep microchannel formed in the porcine skin. (B) *In vitro* drug release profile from rhodamine 6G-loaded microneedles.

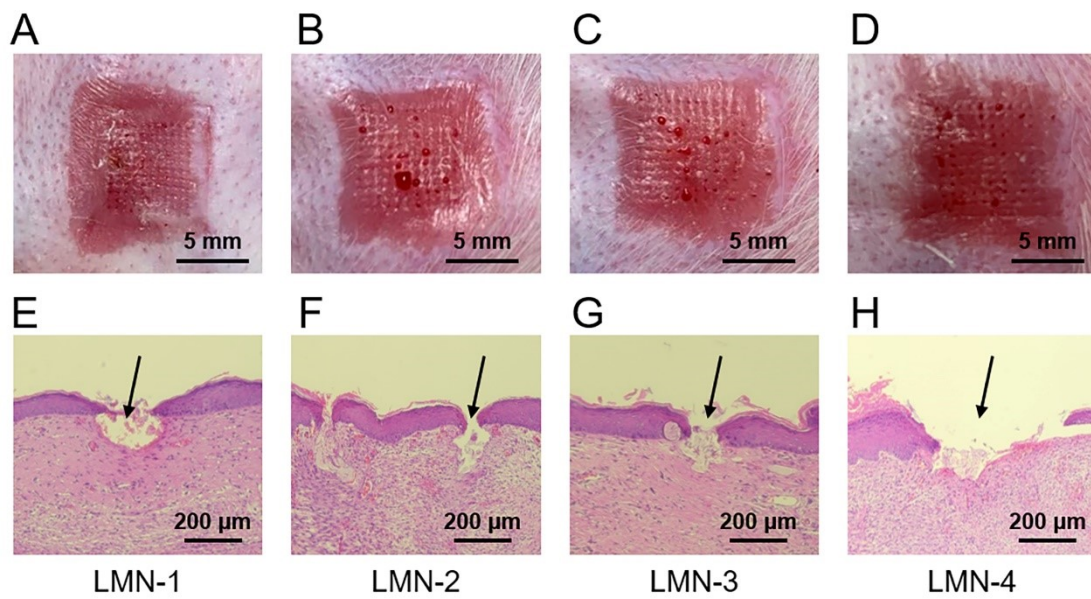

**Fig. S6** Optical images (A-D) and relative H&E staining images (E-H) of postoperative HSs after insertion with different microneedle patches, including LMN-1 (A, E), LMN-2 (B, F), LMN-3 (C, G), and LMN-4 (D, H), respectively.

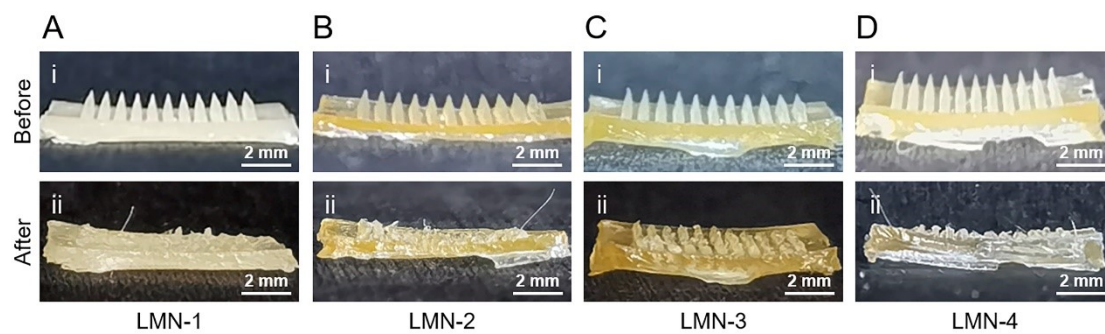

**Fig. S7** Optical images of losartan-loaded microneedle patches before insertion and after 10-minute insertion into HSs. The microneedles include LMN-1 (A), LMN-2 (B), LMN-3 (C), and LMN-4 (D), respectively.



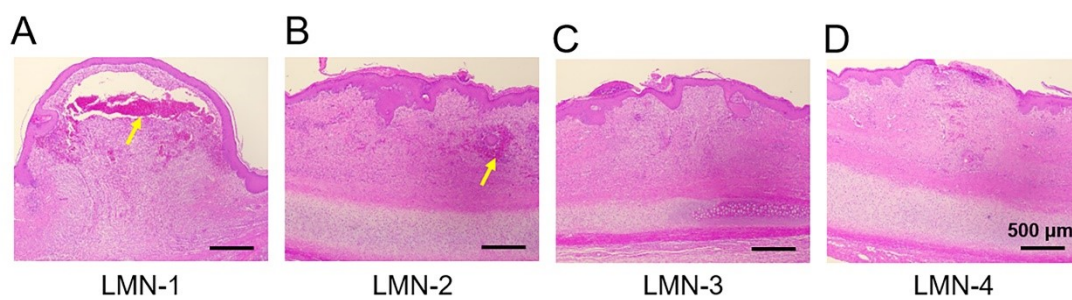

**Fig. S8** H&E staining images of HSs treated with different losartan-loaded microneedle patches. The yellow arrows indicate the area of bleeding in HSs.
